# Supplementary material
Source: PubMed Central journal article supplement (PMC5137261)
Supplement: supp_bgw097_Supplementary_Table_1_2.pdf [file supp_bgw097_Supplementary_Table_1_2.pdf]

**Supplementary Table 1. Genes with copy number alterations observed in *BLG-Aurora-A* mouse mammary tumors.**

Genomic DNAs from tumors were analyzed by CGH array in duplicate (annoated as A, B with sample ID). Copy numbers of respective genes: 3-5, copy gained; 0-1, copy lost.

**A) Genes gained in 2 out of 3 *BLG-Aurora-A* mouse mammary tumors**

| Symbol               | GenBank      | Chromosome | Tumor 1A | Tumor 1B | Tumor 2A | Tumor 2B | Tumor 3A | Tumor 3B |
|----------------------|--------------|------------|----------|----------|----------|----------|----------|----------|
| <i>Adam6a</i>        | NM_174885    | 12         | 4        | 4        | 5        | 5        | 5        | 3        |
| <i>1700097N02Rik</i> | NR_045287    | 17         | 2        | 2        | 5        | 5        | 4        | 4        |
| <i>Btbd9</i>         | NM_172618    | 17         | 2        | 2        | 5        | 5        | 4        | 4        |
| <i>Dnahc8</i>        | NM_013811    | 17         | 2        | 2        | 5        | 5        | 4        | 4        |
| <i>Glo1</i>          | NM_001113560 | 17         | 2        | 2        | 5        | 5        | 4        | 4        |
| <i>Glp1r</i>         | NM_021332    | 17         | 2        | 2        | 5        | 5        | 4        | 4        |
| <i>Ddx39b</i>        | NM_019693    | 17         | 2        | 4        | 5        | 5        | 4        | 4        |
| <i>H2-D1</i>         | NM_010380    | 17         | 2        | 4        | 5        | 5        | 4        | 4        |
| <i>LOC547349</i>     | NM_001025208 | 17         | 2        | 4        | 5        | 5        | 4        | 4        |
| <i>Dcc</i>           | NM_007831    | 18         | 3        | 3        | 3        | 3        | 2        | 2        |

**B) Genes lost in 2 out of 3 *BLG-Aurora-A* mouse mammary tumors**

| Symbol               | GenBank      | Chromosome | Tumor 1A | Tumor 1B | Tumor 2A | Tumor 2B | Tumor 3A | Tumor 3B |
|----------------------|--------------|------------|----------|----------|----------|----------|----------|----------|
| <i>4832428D23Rik</i> | NM_207281    | 1          | 0        | 2        | 2        | 2        | 0        | 1        |
| <i>Erc5</i>          | NM_011729    | 1          | 0        | 2        | 2        | 2        | 0        | 1        |
| <i>Chi3l3</i>        | NM_009892    | 3          | 0        | 0        | 0        | 0        | 2        | 2        |
| <i>Chi3l4</i>        | NM_145126    | 3          | 0        | 0        | 0        | 0        | 2        | 2        |
| <i>Alg14</i>         | NM_024178    | 3          | 1        | 2        | 0        | 0        | 2        | 2        |
| <i>Tmem56</i>        | NM_178936    | 3          | 1        | 2        | 0        | 0        | 2        | 2        |
| <i>Synpo2</i>        | NM_080451    | 3          | 1        | 2        | 2        | 0        | 1        | 2        |
| <i>Txk</i>           | NM_001122754 | 5          | 2        | 1        | 0        | 0        | 2        | 2        |
| <i>2700023E23Rik</i> | NR_015531    | 5          | 2        | 1        | 1        | 1        | 2        | 2        |
| <i>Snora26</i>       | NR_031758    | 5          | 2        | 1        | 1        | 1        | 2        | 2        |
| <i>Usp46</i>         | NM_177561    | 5          | 2        | 1        | 1        | 1        | 2        | 2        |
| <i>Piwil1</i>        | NM_021311    | 5          | 1        | 1        | 0        | 0        | 1        | 1        |
| <i>Rimbp2</i>        | NM_001081388 | 5          | 1        | 0        | 0        | 0        | 1        | 1        |
| <i>Klra12</i>        | NM_010646    | 6          | 0        | 0        | 2        | 2        | 0        | 0        |
| <i>Klra14</i>        | NM_001252149 | 6          | 0        | 0        | 2        | 2        | 0        | 0        |
| <i>Klra15</i>        | NM_013793    | 6          | 0        | 0        | 2        | 2        | 0        | 0        |

|                      |              |    |   |   |   |   |   |   |
|----------------------|--------------|----|---|---|---|---|---|---|
| <i>Klra18</i>        | NM_053153    | 6  | 0 | 0 | 2 | 2 | 0 | 0 |
| <i>Klra19</i>        | NM_053154    | 6  | 0 | 0 | 2 | 2 | 0 | 0 |
| <i>Klra21</i>        | NM_053151    | 6  | 0 | 0 | 2 | 2 | 0 | 0 |
| <i>Klra22</i>        | NM_053152    | 6  | 0 | 0 | 2 | 2 | 0 | 0 |
| <i>Klra33</i>        | NM_001039118 | 6  | 0 | 0 | 2 | 2 | 0 | 0 |
| <i>Klra4</i>         | NM_001252577 | 6  | 0 | 0 | 2 | 2 | 0 | 0 |
| <i>Klra6</i>         | NM_008464    | 6  | 0 | 0 | 2 | 2 | 0 | 0 |
| <i>Klra7</i>         | NM_001110323 | 6  | 0 | 0 | 2 | 2 | 0 | 0 |
| <i>Klra8</i>         | NM_001101620 | 6  | 0 | 0 | 2 | 2 | 0 | 0 |
| <i>Klra9</i>         | NM_010651    | 6  | 0 | 0 | 2 | 2 | 0 | 0 |
| <i>Ifitd1</i>        | NM_028742    | 6  | 2 | 2 | 1 | 2 | 1 | 1 |
| <i>Tuba3b</i>        | NM_009449    | 6  | 2 | 2 | 1 | 2 | 1 | 1 |
| <i>Vmn2r58</i>       | NM_001105055 | 7  | 2 | 2 | 0 | 0 | 0 | 2 |
| <i>Vmn2r-ps54</i>    | NR_004441    | 7  | 2 | 2 | 0 | 0 | 0 | 2 |
| <i>Fli1</i>          | NM_008026    | 9  | 2 | 1 | 2 | 1 | 1 | 2 |
| <i>3110003A17Rik</i> | NM_028440    | 10 | 2 | 0 | 2 | 2 | 0 | 0 |
| <i>Nlrp1b</i>        | NM_001040696 | 11 | 0 | 0 | 0 | 0 | 2 | 2 |
| <i>Nlrp1c-ps</i>     | NR_027858    | 11 | 0 | 0 | 0 | 0 | 2 | 2 |
| <i>Serpina1a</i>     | NM_001252569 | 12 | 1 | 0 | 2 | 2 | 0 | 0 |
| <i>Serpina1c</i>     | NM_009245    | 12 | 1 | 0 | 2 | 2 | 0 | 0 |
| <i>Serpina1e</i>     | NM_009247    | 12 | 1 | 0 | 2 | 2 | 0 | 0 |
| <i>Serpina11</i>     | NM_001166350 | 12 | 1 | 0 | 2 | 2 | 1 | 0 |
| <i>Serpina9</i>      | NM_027997    | 12 | 1 | 0 | 2 | 2 | 1 | 0 |
| <i>4933413L06Rik</i> | NR_045508    | 13 | 1 | 1 | 2 | 2 | 2 | 1 |
| <i>Hcn1</i>          | NM_010408    | 13 | 1 | 1 | 2 | 2 | 2 | 1 |
| <i>4930503E14Rik</i> | NM_029131    | 14 | 0 | 0 | 0 | 0 | 0 | 0 |
| <i>Ang6</i>          | NM_001011876 | 14 | 0 | 0 | 0 | 0 | 0 | 0 |
| <i>BC061237</i>      | NM_198677    | 14 | 0 | 0 | 0 | 0 | 0 | 0 |
| <i>Ear12</i>         | NM_001012766 | 14 | 0 | 0 | 0 | 0 | 0 | 0 |
| <i>Ear2</i>          | NM_007895    | 14 | 0 | 0 | 0 | 0 | 0 | 0 |
| <i>Ear3</i>          | NM_017388    | 14 | 0 | 0 | 0 | 0 | 0 | 0 |
| <i>Gm8267</i>        | NM_001162954 | 14 | 0 | 0 | 0 | 0 | 0 | 0 |
| <i>Mettl17</i>       | NM_001029990 | 14 | 2 | 2 | 1 | 1 | 1 | 2 |
| <i>Ndrp2</i>         | NM_001145959 | 14 | 2 | 2 | 1 | 1 | 1 | 2 |

|                      |              |    |   |   |   |   |   |   |
|----------------------|--------------|----|---|---|---|---|---|---|
| <i>Rnase13</i>       | NM_001011687 | 14 | 2 | 2 | 1 | 1 | 1 | 2 |
| <i>Slc39a2</i>       | NM_001039676 | 14 | 2 | 2 | 1 | 1 | 1 | 2 |
| <i>Tppp2</i>         | NM_001128634 | 14 | 2 | 2 | 1 | 1 | 1 | 2 |
| <i>Chd8</i>          | NM_201637    | 14 | 2 | 1 | 1 | 1 | 0 | 2 |
| <i>Entpd4</i>        | NM_026174    | 14 | 0 | 0 | 0 | 0 | 1 | 2 |
| <i>Gm16677</i>       | NR_045091    | 14 | 0 | 0 | 0 | 0 | 1 | 2 |
| <i>Loxl2</i>         | NM_033325    | 14 | 0 | 0 | 0 | 0 | 1 | 2 |
| <i>Slc25a37</i>      | NM_026331    | 14 | 0 | 0 | 0 | 0 | 1 | 2 |
| <i>Synb</i>          | NM_173420    | 14 | 0 | 0 | 0 | 0 | 1 | 2 |
| <i>1190002H23Rik</i> | NM_025427    | 14 | 2 | 2 | 0 | 0 | 1 | 2 |
| <i>Zfp957</i>        | NM_001033215 | 14 | 2 | 2 | 0 | 0 | 1 | 2 |
| <i>Mcc</i>           | NM_001085374 | 18 | 2 | 2 | 0 | 0 | 0 | 0 |
| <i>Lrp5</i>          | NM_008513    | 19 | 1 | 2 | 1 | 1 | 2 | 2 |
| <i>Gm960</i>         | NM_001033447 | 19 | 2 | 2 | 1 | 1 | 0 | 0 |
| <i>Lrfn4</i>         | NM_153388    | 19 | 2 | 2 | 1 | 1 | 0 | 0 |
| <i>Pcx</i>           | NM_001162946 | 19 | 2 | 2 | 1 | 1 | 0 | 0 |
| <i>Rce1</i>          | NM_023131    | 19 | 2 | 2 | 1 | 1 | 0 | 0 |
| <i>Syt7</i>          | NM_173068    | 19 | 1 | 1 | 1 | 1 | 2 | 1 |
| <i>Lrrc10b</i>       | NM_001111140 | 19 | 1 | 1 | 1 | 1 | 2 | 1 |
| <i>Ppp1r32</i>       | NM_133689    | 19 | 1 | 1 | 1 | 1 | 2 | 1 |
| <i>A330040F15Rik</i> | NR_015503    | 19 | 1 | 1 | 1 | 1 | 2 | 2 |
| <i>Cntf</i>          | NM_170786    | 19 | 1 | 1 | 1 | 1 | 2 | 2 |
| <i>Dtx4</i>          | NM_172442    | 19 | 1 | 1 | 1 | 1 | 2 | 2 |
| <i>Fam111a</i>       | NM_026640    | 19 | 1 | 1 | 1 | 1 | 2 | 2 |
| <i>Glyat</i>         | NM_145935    | 19 | 1 | 1 | 1 | 1 | 2 | 2 |
| <i>Gm4952</i>        | NM_001167907 | 19 | 1 | 1 | 1 | 1 | 2 | 2 |
| <i>Gm5512</i>        | NR_002891    | 19 | 1 | 1 | 1 | 1 | 2 | 2 |
| <i>Keg1</i>          | NM_029550    | 19 | 1 | 1 | 1 | 1 | 2 | 2 |
| <i>Lpxn</i>          | NM_134152    | 19 | 1 | 1 | 1 | 1 | 2 | 2 |
| <i>Mpeg1</i>         | NM_010821    | 19 | 1 | 1 | 1 | 1 | 2 | 2 |
| <i>Olf1r1442</i>     | NM_146697    | 19 | 1 | 1 | 1 | 1 | 2 | 2 |
| <i>Olf1r1443</i>     | NM_146698    | 19 | 1 | 1 | 1 | 1 | 2 | 2 |
| <i>Olf1r1444</i>     | NM_146702    | 19 | 1 | 1 | 1 | 1 | 2 | 2 |
| <i>Olf1r1445</i>     | NM_146699    | 19 | 1 | 1 | 1 | 1 | 2 | 2 |

|                      |              |    |   |   |   |   |   |   |
|----------------------|--------------|----|---|---|---|---|---|---|
| <i>Olf1446</i>       | NM_146704    | 19 | 1 | 1 | 1 | 1 | 2 | 2 |
| <i>Olf1447</i>       | NM_146703    | 19 | 1 | 1 | 1 | 1 | 2 | 2 |
| <i>Olf1448</i>       | NM_146701    | 19 | 1 | 1 | 1 | 1 | 2 | 2 |
| <i>Olf1449</i>       | NM_146303    | 19 | 1 | 1 | 1 | 1 | 2 | 2 |
| <i>Olf1450</i>       | NM_146371    | 19 | 1 | 1 | 1 | 1 | 2 | 2 |
| <i>Olf1451</i>       | NM_146705    | 19 | 1 | 1 | 1 | 1 | 2 | 2 |
| <i>Olf1453</i>       | NM_146700    | 19 | 1 | 1 | 1 | 1 | 2 | 2 |
| <i>Olf1454</i>       | NM_146692    | 19 | 1 | 1 | 1 | 1 | 2 | 2 |
| <i>Olf1457</i>       | NM_146575    | 19 | 1 | 1 | 1 | 1 | 2 | 2 |
| <i>Olf1459</i>       | NM_146689    | 19 | 1 | 1 | 1 | 1 | 2 | 2 |
| <i>Olf1461</i>       | NM_146302    | 19 | 1 | 1 | 1 | 1 | 2 | 2 |
| <i>Olf1462</i>       | NM_146693    | 19 | 1 | 1 | 1 | 1 | 2 | 2 |
| <i>Olf1463</i>       | NM_001011840 | 19 | 1 | 1 | 1 | 1 | 2 | 2 |
| <i>Olf1465</i>       | NM_001011841 | 19 | 1 | 1 | 1 | 1 | 2 | 2 |
| <i>Olf1466</i>       | NM_146694    | 19 | 1 | 1 | 1 | 1 | 2 | 2 |
| <i>Olf1467</i>       | NM_146691    | 19 | 1 | 1 | 1 | 1 | 2 | 2 |
| <i>Olf1469</i>       | NM_146695    | 19 | 1 | 1 | 1 | 1 | 2 | 2 |
| <i>Olf1471</i>       | NM_207132    | 19 | 1 | 1 | 1 | 1 | 2 | 2 |
| <i>Olf1472</i>       | NM_146690    | 19 | 1 | 1 | 1 | 1 | 2 | 2 |
| <i>Olf1474</i>       | NM_001011842 | 19 | 1 | 1 | 1 | 1 | 2 | 2 |
| <i>Olf1475</i>       | NM_146301    | 19 | 1 | 1 | 1 | 1 | 2 | 2 |
| <i>Olf1477</i>       | NM_146696    | 19 | 1 | 1 | 1 | 1 | 2 | 2 |
| <i>Olf1480</i>       | NM_207575    | 19 | 1 | 1 | 1 | 1 | 2 | 2 |
| <i>Olf1484</i>       | NM_146291    | 19 | 1 | 1 | 1 | 1 | 2 | 2 |
| <i>Olf1487</i>       | NM_146636    | 19 | 1 | 1 | 1 | 1 | 2 | 2 |
| <i>Olf1489</i>       | NM_146635    | 19 | 1 | 1 | 1 | 1 | 2 | 2 |
| <i>U05342</i>        | NR_024093    | 19 | 1 | 1 | 1 | 1 | 2 | 2 |
| <i>Zfp91</i>         | NM_053009    | 19 | 1 | 1 | 1 | 1 | 2 | 2 |
| <i>Gcnt1</i>         | NM_010265    | 19 | 2 | 2 | 0 | 0 | 1 | 1 |
| <i>Pcsk5</i>         | NM_001190483 | 19 | 2 | 2 | 0 | 0 | 1 | 1 |
| <i>Prune2</i>        | NM_181348    | 19 | 2 | 2 | 0 | 0 | 1 | 1 |
| <i>Rfk</i>           | NM_019437    | 19 | 2 | 2 | 0 | 0 | 1 | 1 |
| <i>Pcsk5</i>         | NM_001190483 | 19 | 2 | 2 | 0 | 0 | 2 | 1 |
| <i>2700046G09Rik</i> | NR_033198    | 19 | 1 | 1 | 1 | 1 | 2 | 2 |

|                      |              |    |   |   |   |   |   |   |
|----------------------|--------------|----|---|---|---|---|---|---|
| <i>Minpp1</i>        | NM_010799    | 19 | 1 | 1 | 1 | 1 | 2 | 2 |
| <i>Sgms1</i>         | NM_144792    | 19 | 1 | 1 | 1 | 1 | 2 | 2 |
| <i>Atad1</i>         | NM_026487    | 19 | 0 | 0 | 1 | 1 | 2 | 2 |
| <i>Papss2</i>        | NM_011864    | 19 | 0 | 0 | 1 | 1 | 2 | 2 |
| <i>Pten</i>          | NM_008960    | 19 | 1 | 1 | 1 | 1 | 2 | 2 |
| <i>Rnls</i>          | NM_001167818 | 19 | 1 | 1 | 1 | 1 | 2 | 2 |
| <i>4930552P12Rik</i> | NR_045318    | 19 | 1 | 1 | 1 | 1 | 2 | 2 |
| <i>Acsl5</i>         | NM_027976    | 19 | 1 | 1 | 1 | 1 | 2 | 2 |
| <i>Gucy2g</i>        | NM_001081076 | 19 | 1 | 1 | 1 | 1 | 2 | 2 |
| <i>Tcf7l2</i>        | NM_001142923 | 19 | 1 | 1 | 1 | 1 | 2 | 2 |
| <i>Tectb</i>         | NM_009348    | 19 | 1 | 1 | 1 | 1 | 2 | 2 |
| <i>Vti1a</i>         | NM_016862    | 19 | 1 | 1 | 1 | 1 | 2 | 2 |
| <i>Zdhhc6</i>        | NM_001033573 | 19 | 1 | 1 | 1 | 1 | 2 | 2 |

---
