# Supplementary material
Source: PubMed Central journal article supplement (PMC5137261)
Supplement: supp_bgw097_Supplementary_Table_2_2.pdf [file supp_bgw097_Supplementary_Table_2_2.pdf]

---

**Gene Symbol**

---

*SENP6*

*ZFHX4*

*DMD*

*PTCH1*

*ZNF462*

*PLEKHA4*

*ATP4A*

*FOLH1*

*MRC2*

*COBLL1*

*FMN1*

*AGBL1*

*RPS6KA6*

*UBR3*

*ZNF613*

*DHX57*

*GRAMD1A*

*MSI2*

*PDE3B*

*PPIG*

*TTBK2*

*RGL2*

*TMEM107*

*UBXN8*

*CHRNA6*

*HLA-DRA*

*NDUFS1*

*SENP3*

*TBPL2*

*KIAA0355*

*ELF5*

---

**Supplementary Table 2.** 31 human orthologues of the mouse genes (total 36) mutated in 2 of the 3 *BLG-Aurora-A* mouse mammary tumors.
