# Supplementary material
Source: PubMed Central journal article supplement (PMC5137261)
Supplement: supp_bgw097_Supplementary_Table_3_2.pdf [file supp_bgw097_Supplementary_Table_3_2.pdf]

| Human gene symbol | # of mutations in TCGA | Mouse gene symbol | Tumor 1                  | Tumor 2                   | Tumor 3                  |
|-------------------|------------------------|-------------------|--------------------------|---------------------------|--------------------------|
| ZFHX4             | 20                     | Zfhx4             | None                     | exon2:c.1011delA:p.P337fs | exon11:c.C9436A:p.Q3146K |
| DMD               | 18                     | Dmd               | None                     | exon38:c.C5367A:p.N1789K  | exon3:c.C103T:p.Q35X     |
| PLEKHA4           | 9                      | Plekha4           | exon8:c.C968T:p.T323M    | None                      | exon7:c.G500A:p.R167H    |
| PTCH1             | 7                      | Ptch1             | exon23:c.C3800A:p.T1267N | None                      | exon6:c.884delC:p.P295fs |
| ZNF462            | 7                      | Zfp462            | exon3:c.C860T:p.A287V    | None                      | exon3:c.C595T:p.P199S    |
| ATP4A             | 5                      | Atp4a             | exon10:c.T1484C:p.I495T  | exon13:c.C1989G:p.D663E   | None                     |
| FOLH1             | 5                      | Folh1             | exon19:c.G2246T:p.R749M  | exon7:c.C861A:p.N287K     | None                     |

**Supplementary Table 3. Mutation profiles observed in *BLG-Aurora-A* mouse mammary tumors and human breast tumors (TCGA), selected according to the schema shown in Supplementary Figure 1. Profiles show mutated exon: coding nucleotide change: protein amino acid change.**
